# Supplementary material
Source: PubMed Central journal article supplement (PMC9464301)
Supplement: mmc1.pdf [file mmc1.pdf]

# THE LANCET

## Infectious Diseases

### Supplementary appendix 1

This translation in Hindi was submitted by the authors and we reproduce it as supplied. It has not been peer reviewed. *The Lancet's* editorial processes have only been applied to the original in English, which should serve as reference for this manuscript.

हिंदी में यह अनुवाद लेखकों द्वारा प्रस्तुत किया गया था और हम इसे जैसे उपलब्ध कराया गया वैसे पुनः पेश करते हैं। इस पर सहकर्मी की समीक्षा नहीं की गई है। लैंसेट की संपादकीय प्रक्रियाओं को केवल अंग्रेजी में मूल पर लागू किया गया है, जो इस पांडुलिपि के संदर्भ के रूप में काम आना चाहिए।

Supplement to: Kanungo S, Chatterjee P, Bavdekar A, et al. Safety and immunogenicity of the Rotavac and Rotasiil rotavirus vaccines administered in an interchangeable dosing schedule among healthy Indian infants: a multicentre, open-label, randomised, controlled, phase 4, non-inferiority trial. *Lancet Infect Dis* 2022; published online May 16. [https://doi.org/10.1016/S1473-3099\(22\)00161-X](https://doi.org/10.1016/S1473-3099(22)00161-X).

रोटावैक और रोटसिल की सुरक्षा एवं प्रतिरक्षाजनकता रोटवायरस टीके एक अंतः परिवर्तनीय में प्रशासित स्वस्थ भारतीय शिशुओं में खुराक की अनुसूची: एक बहुकेंद्र, ओपन-लेबल, यादृच्छिक, नियंत्रित, चरण 4, नॉन इन्फेरिओरिटी पर परीक्षण

## सारांश

रोटावायरस की पृष्ठभूमि में कम-आय और मध्यम-आय वाले देशों में 5 वर्ष से कम आयु के बच्चों में गंभीर निर्जलीकरण गैस्ट्रोएंटेराइटिस का प्रमुख कारण पानी की कमी है। भारत में नियमित टीकाकरण में दो टीके-रोटावैक और रोटसिल का उपयोग किया जाता है। मिश्रित आहार में प्रशासित इन टीकों की सुरक्षा और प्रतिरक्षाजनकता का दस्तावेजीकरण नहीं किया गया है। इसलिए हमने एक मिश्रित आहार बनाम एकल आहार के प्राप्तकर्ताओं की सुरक्षा और सेरोरेस्पॉन्स की तुलना करने का लक्ष्य रखा है।

## प्रणाली

हमने भारत में दो साइटों पर एक बहुकेंद्र, ओपन लेबल, यादृच्छिक, नियंत्रित, चरण 4, नॉन इन्फेरिओरिटी परीक्षण किया। हमने 6-8 सप्ताह की आयु के स्वस्थ शिशुओं की जांच की। प्रणालीगत विकारों वाले शिशु, वजन-के-ऊंचाई Z स्कोर शून्य से  $-3$  SDs, या लगातार दस्त बीमारी के इतिहास को बाहर रखा गया था। उपयुक्त शिशुओं को समान संख्या में छह समूहों में यादृच्छिक रूप से आवंटित किया गया था ताकि एकल टीका आहार प्राप्त किया जा सके (अर्थात्, रोटवैक-रोटावैक-रोटावैक [ग्रुप 1] या रोटसिल-रोटासिल-रोटासिल [ग्रुप 2]) या मिश्रित टीका आहार (अर्थात्, रोटवैक-रोटासिल-रोटावैक [ग्रुप 3], रोटसिल-रोटावैक-रोटासिल [ग्रुप 4], रोटवैक-रोटासिल-रोटासिल [ग्रुप 5], या रोटसिल-रोटावैक-रोटावैक [ग्रुप 6])। रैंडमाइजेशन कम से कम 12 के ब्लॉक में साइट द्वारा ऑनलाइन सॉफ्टवेयर का उपयोग करके किया गया था। प्राथमिक परिणाम रोटवायरस वैक्सीन के लिए सेरोरेस्पॉन्स था, जिसे तीसरी खुराक के 4 सप्ताह बाद रोटवायरस-विशिष्ट सीरम IgA एंटीबॉडी का उपयोग करके मापा जाता है। प्राप्तकर्ताओं के साथ चार मिश्रित वैक्सीन रेजिमेंस (रोटावैक और रोटसिल के विभिन्न संयोजनों से मिलकर) के प्राप्तकर्ताओं के बीच सेरोरेस्पॉन्स दरों की तुलना की गई थी एकल वैक्सीन रेजिमेंस (केवल तीनों खुराक के लिए रोटवैक या रोटसिल से मिलकर)। नॉन इन्फेरिओरिटी 10% के मार्जिन पर सेट किया गया था। इस अध्ययन में भागीदारी की अवधि हेतु सुरक्षा की अनुवर्ती कार्रवाई की गई। यह परीक्षण

क्लिनिकल भारत परीक्षण रजिस्ट्री, नंबर CTRI/2018/08/015317 के साथ पंजीकृत किया गया था।

### जाँच - परिणाम

25 मार्च, 2019 एवं 15 जनवरी, 2020 के बीच जांच-परिणाम, कुल 1979 उपर्युक्त शिशुओं को एक एकल टीका आहार (n= 659; ग्रुप 1 में 329 और ग्रुप 2 में 330) या एक मिश्रित टीका (n=1320; 329) ग्रुप 3 और 4, और 331 प्रत्येक ग्रुप 5 और 6 में) प्रत्येक इंच आहार प्राप्त करने के लिए यादृच्छिक रूप से सौंपा गया था। सभी पात्र प्रतिभागियों को पहली खुराक, 1925 (97.3%) प्राप्त हुई 1979 को दूसरी खुराक मिली और 1894 (95.7%) ने टीके की तीनों खुराकें प्राप्त कीं। 1979 प्रतिभागियों में से 1852 (93.6%) ने अनुवर्ती कार्रवाई पूरी की गई। इम्युनोजेनेसिटी विश्लेषण में 1839 शिशु को (1238 [67-3%] मिश्रित टीका आहार और 601 [32.7%] एकल टीका आहार में शामिल किए गए थे; 13 नमूने मात्रा में अपर्याप्त थे) जिन्होंने टीकाकरण पूरा किया और टीकाकरण के बाद सेरा प्रदान किया गया। मिश्रित वैक्सीन रेजिमेन समूह (33.5% [95% CI 30.9-36.2]) में सेरोरेस्पॉन्स दर एकल वैक्सीन रेजिमेन ग्रुप (29.6% [26.1-33.4]); की तुलना में नॉन इन्फिरियर थी। सेरोरेस्पॉन्स (95% CI -0.7 से 8.3) 3.9% दर में अंतर था। किसी भी प्रकार के अनुरोध वाले प्रतिभागियों का अनुपात प्रतिकूल घटनाएँ एकल वैक्सीन रेजिमेन समूह में 90-9% (95% CI 88.4-93.0) और टीका संबंधी आहार वर्ग मिश्रण में 91-1% (89.5-92.6) थीं। इस अध्ययन के दौरान किसी भी टीके से संबंधित गंभीर प्रतिकूल घटनाओं या घुसपैठ की सूचना प्राप्त नहीं की गई।

### व्याख्या

रोटावैक एवं रोटसिल को नियमित टीकाकरण हेतु एक अंतः परिवर्तनीय तरीके से सुरक्षित रूप में इस्तेमाल किया जा सकता है क्योंकि एकल टीका आहार की तुलना में मिश्रित टीका आहार में सेरोरेस्पॉन्स नॉन इन्फिरियर था। ये परिणाम टीकों के प्रशासन में लचीलेपन की अनुमति देते हैं, टीके की कमी को दूर करने में मदद करते हैं और आपूर्ति श्रृंखला के मुद्दे, और प्रवासी आबादी को आसानी से लक्षित करना।
