# Supplementary material
Source: PubMed Central journal article supplement (PMC9464301)
Supplement: mmc2.pdf [file mmc2.pdf]

# THE LANCET

## Infectious Diseases

### Supplementary appendix 2

This appendix formed part of the original submission and has been peer reviewed. We post it as supplied by the authors.

Supplement to: Kanungo S, Chatterjee P, Bavdekar A, et al. Safety and immunogenicity of the Rotavac and Rotasiil rotavirus vaccines administered in an interchangeable dosing schedule among healthy Indian infants: a multicentre, open-label, randomised, controlled, phase 4, non-inferiority trial. *Lancet Infect Dis* 2022; published online May 16. [https://doi.org/10.1016/S1473-3099\(22\)00161-X](https://doi.org/10.1016/S1473-3099(22)00161-X).

Supplementary table 1 Baseline characteristics of study participants by vaccine arms

|              |              | Single rotavirus vaccine regimen                       |                                                           | Mixed rotavirus vaccine regimen                         |                                                          |                                                          |                                                         |
|--------------|--------------|--------------------------------------------------------|-----------------------------------------------------------|---------------------------------------------------------|----------------------------------------------------------|----------------------------------------------------------|---------------------------------------------------------|
|              |              | Arm 1:<br>Rotavac -<br>Rotavac -<br>Rotavac<br>(n=329) | Arm 2:<br>Rotasiil -<br>Rotasiil -<br>Rotasiil<br>(n=330) | Arm 3:<br>Rotavac -<br>Rotasiil -<br>Rotavac<br>(n=329) | Arm 4:<br>Rotasiil -<br>Rotavac -<br>Rotasiil<br>(n=329) | Arm 5:<br>Rotavac -<br>Rotasiil -<br>Rotasiil<br>(n=331) | Arm 6:<br>Rotasiil -<br>Rotavac -<br>Rotavac<br>(n=331) |
| Sex          | Male n (%)   | 162 (49.2)                                             | 164 (49.7)                                                | 155 (47.1)                                              | 178 (54.1)                                               | 180 (54.4)                                               | 157 (47.4)                                              |
|              | Female n (%) | 167 (50.8)                                             | 166 (50.3)                                                | 174 (52.9)                                              | 151 (45.9)                                               | 151 (45.6)                                               | 174 (52.6)                                              |
| Age (days)   | Mean (SD)    | 47.6 (4.0)                                             | 47.3 (4.0)                                                | 46.8 (3.7)                                              | 47.4 (4.0)                                               | 47.2 (4.1)                                               | 47.4 (4.0)                                              |
| Weight (kgs) | Mean (SD)    | 4.2 (0.6)                                              | 4.3 (0.6)                                                 | 4.2 (0.6)                                               | 4.2 (0.6)                                                | 4.2 (0.6)                                                | 4.2 (0.6)                                               |
| Height (cms) | Mean (SD)    | 54.3 (2.4)                                             | 54.2 (2.4)                                                | 54.1 (2.4)                                              | 54.1 (2.5)                                               | 54.2 (2.5)                                               | 54.1 (2.2)                                              |

Supplementary table 2 Sero-response rate by vaccine arms

|                                                                                |               | Single rotavirus vaccine regimen            |                                                | Mixed rotavirus vaccine regimen              |                                               |                                               |                                              |
|--------------------------------------------------------------------------------|---------------|---------------------------------------------|------------------------------------------------|----------------------------------------------|-----------------------------------------------|-----------------------------------------------|----------------------------------------------|
| Sero-response*                                                                 |               | Arm 1:<br>Rotavac -<br>Rotavac -<br>Rotavac | Arm 2:<br>Rotasiil -<br>Rotasiil -<br>Rotasiil | Arm 3:<br>Rotavac -<br>Rotasiil -<br>Rotavac | Arm 4:<br>Rotasiil -<br>Rotavac -<br>Rotasiil | Arm 5:<br>Rotavac -<br>Rotasiil -<br>Rotasiil | Arm 6:<br>Rotasiil -<br>Rotavac -<br>Rotavac |
| Number of participants                                                         |               | 303                                         | 298                                            | 315                                          | 302                                           | 314                                           | 307                                          |
| Number with sero-response                                                      |               | 73                                          | 105                                            | 108                                          | 97                                            | 120                                           | 90                                           |
| Sero response rate (95% CI)                                                    |               | 24.1%<br>(19.5, 29.1)                       | 35.2%<br>(30.0, 40.8)                          | 34.3%<br>(29.2, 39.7)                        | 32.1%<br>(27.0, 37.5)                         | 38.2%<br>(33.0, 43.7)                         | 29.3%<br>(24.4, 34.6)                        |
| With four fold raise in IgA antibodies compared to baseline titre of $\geq 20$ | n             | 6                                           | 12                                             | 6                                            | 10                                            | 6                                             | 6                                            |
|                                                                                | %<br>(95% CI) | 2.0%<br>(0.8, 4.0)                          | 4.0%<br>(2.2, 6.7)                             | 1.9%<br>(0.8, 3.9)                           | 3.3%<br>(1.7, 5.8)                            | 1.9%<br>(0.8, 3.9)                            | 2.0%<br>(0.8, 4.0)                           |
| With IgA antibody titre of $\geq 20$ compared to titre $< 20$ at baseline      | n             | 67                                          | 93                                             | 102                                          | 87                                            | 114                                           | 84                                           |
|                                                                                | %<br>(95% CI) | 22.1%<br>(17.7, 27.0)                       | 31.2%<br>(26.1, 36.6)                          | 32.4%<br>(27.4, 37.7)                        | 28.8%<br>(23.9, 34.1)                         | 36.3%<br>(31.1, 41.7)                         | 27.4%<br>(22.6, 32.5)                        |

\* Sero response was defined as four-fold raise in IgA antibody titres after third dose when baseline titre was  $\geq 20$  IU/mL OR IgA antibody titre of  $\geq 20$  IU/mL after third dose when baseline titre was  $< 20$  IU/mL

Supplementary table 3 Geometric mean titres (GMT) of IgA antibodies by vaccine arms

| Visit                              |                                                                 | Single rotavirus vaccine regimen            |                                                |                   | Mixed rotavirus vaccine regimen              |                                               |                                               |                                              |                   |
|------------------------------------|-----------------------------------------------------------------|---------------------------------------------|------------------------------------------------|-------------------|----------------------------------------------|-----------------------------------------------|-----------------------------------------------|----------------------------------------------|-------------------|
|                                    |                                                                 | Arm 1:<br>Rotavac –<br>Rotavac –<br>Rotavac | Arm 2:<br>Rotasiil –<br>Rotasiil –<br>Rotasiil | Arms 1<br>and 2   | Arm 3:<br>Rotavac –<br>Rotasiil –<br>Rotavac | Arm 4:<br>Rotasiil –<br>Rotavac –<br>Rotasiil | Arm 5:<br>Rotavac –<br>Rotasiil –<br>Rotasiil | Arm 6:<br>Rotasiil –<br>Rotavac –<br>Rotavac | Arms 3-6          |
| Baseline: Prior to<br>Dose 1       | Number of participants<br>for whom Results are<br>available (n) | 303                                         | 298                                            | 601               | 315                                          | 302                                           | 314                                           | 307                                          | 1238              |
|                                    | GMT (IU/mL)                                                     | 3.94                                        | 3.41                                           | 3.67              | 3.64                                         | 3.88                                          | 3.41                                          | 3.75                                         | 3.66              |
|                                    | 95% CI                                                          | (3.31,<br>4.66)                             | (2.83,<br>4.07)                                | (3.23,<br>4.15)   | (3.07,<br>4.29)                              | (3.28,<br>4.57)                               | (2.88,<br>4.00)                               | (3.17,<br>4.41)                              | (3.37,<br>3.98)   |
| Day 28 (+/- 7<br>Days) Post Dose 3 | Number of participants<br>for whom Results are<br>available (n) | 303                                         | 298                                            | 601               | 315                                          | 302                                           | 314                                           | 307                                          | 1238              |
|                                    | GMT (IU/mL)                                                     | 12.31                                       | 15.74                                          | 13.91             | 16.15                                        | 18.57                                         | 18.47                                         | 14.00                                        | 16.69             |
|                                    | 95% CI                                                          | (10.24,<br>14.77)                           | (12.90,<br>19.16)                              | (12.15,<br>14.77) | (13.48,<br>19.32)                            | (15.42,<br>22.33)                             | (15.42,<br>22.09)                             | (11.75,<br>16.65)                            | (15.25,<br>18.26) |
| Day 28 (+/- 7<br>Days) Post Dose 3 | Number of participants<br>who sero responded<br>(n)             | 73                                          | 105                                            | 178               | 108                                          | 97                                            | 120                                           | 90                                           | 415               |
|                                    | GMT (IU/mL)                                                     | 72.73                                       | 78.75                                          | 76.22             | 71.15                                        | 94.71                                         | 81.37                                         | 69.86                                        | 78.77             |
|                                    | 95% CI                                                          | (55.74,<br>94.81)                           | (63.49,<br>97.62)                              | (64.50,<br>90.05) | (58.43,<br>86.59)                            | (74.92,<br>119.64)                            | (68.12,<br>97.16)                             | (57.53,<br>84.79)                            | (71.25,<br>87.09) |

Supplementary table 4 Distribution of solicited and unsolicited adverse events within seven days post vaccination (all three doses combined) by vaccine arms

|                          |          | Single rotavirus vaccine regimen           |                                               | Mixed rotavirus vaccine regimen             |                                              |                                              |                                             |
|--------------------------|----------|--------------------------------------------|-----------------------------------------------|---------------------------------------------|----------------------------------------------|----------------------------------------------|---------------------------------------------|
| AE events                |          | Arm 1: Rotavac - Rotavac - Rotavac (n=329) | Arm 2: Rotasiil - Rotasiil - Rotasiil (n=330) | Arm 3: Rotavac - Rotasiil - Rotavac (n=329) | Arm 4: Rotasiil - Rotavac - Rotasiil (n=329) | Arm 5: Rotavac - Rotasiil - Rotasiil (n=331) | Arm 6: Rotasiil - Rotavac - Rotavac (n=331) |
| Any Solicited AE         | n (%), E | 295 (89.7%), 1634                          | 304 (92.1%), 1658                             | 303 (92.1%), 1702                           | 309 (93.9%), 1749                            | 295 (89.1%), 1642                            | 296 (89.4%), 1625                           |
|                          | 95% CI   | (85.6, 92.7)                               | (88.7, 94.8)                                  | (88.6, 94.8)                                | (90.8, 96.2)                                 | (85.3, 92.3)                                 | (85.6, 92.5)                                |
| Diarrhoea                | n (%), E | 32 (9.7%), 36                              | 33 (10.0%), 37                                | 28 (8.5%), 30                               | 32 (9.7%), 38                                | 27 (8.2%), 28                                | 22 (6.6%), 22                               |
|                          | 95% CI   | (6.7, 13.5)                                | (7.0, 13.8)                                   | (5.7, 12.1)                                 | (6.7, 13.5)                                  | (5.4, 11.6)                                  | (4.2, 9.9)                                  |
| Vomiting                 | n (%), E | 33 (10.0%), 41                             | 44 (13.3%), 50                                | 40 (12.2%), 53                              | 38 (11.6%), 46                               | 43 (13.0%), 48                               | 40 (12.1%), 51                              |
|                          | 95% CI   | (7.0, 13.8)                                | (9.9, 17.5)                                   | (8.8, 16.2)                                 | (8.3, 15.5)                                  | (9.6, 17.1)                                  | (8.8, 16.1)                                 |
| Fever                    | n (%), E | 282 (85.7%), 588                           | 289 (87.6%), 619                              | 291 (88.4%), 618                            | 295 (89.7%), 628                             | 282 (85.2%), 579                             | 277 (83.7%), 574                            |
|                          | 95% CI   | (81.5, 89.3)                               | (83.5, 90.9)                                  | (84.5, 91.7)                                | (85.9, 92.7)                                 | (80.9, 88.8)                                 | (79.3, 87.5)                                |
| Decreased appetite       | n (%), E | 146 (44.4%), 238                           | 141 (42.7%), 237                              | 132 (40.1%), 230                            | 156 (47.4%), 263                             | 151 (45.6%), 249                             | 145 (43.8%), 251                            |
|                          | 95% CI   | (38.9, 49.9)                               | (37.3, 48.3)                                  | (34.8, 45.6)                                | (41.9, 53.0)                                 | (40.2, 51.2)                                 | (38.4, 49.3)                                |
| Decreased activity level | n (%), E | 141 (42.9%), 235                           | 132 (40.0%), 218                              | 139 (42.2%), 238                            | 145 (44.1%), 242                             | 143 (43.2%), 245                             | 130 (39.3%), 233                            |
|                          | 95% CI   | (37.4, 48.4)                               | (34.7, 45.5)                                  | (36.9, 47.8)                                | (38.6, 49.6)                                 | (37.8, 48.7)                                 | (34.0, 44.8)                                |
| Irritability             | n (%), E | 251 (76.3%), 471                           | 249 (75.5%), 465                              | 249 (75.7%), 497                            | 258 (78.4%), 499                             | 240 (72.5%), 465                             | 243 (73.4%), 471                            |
|                          | 95% CI   | (71.3, 80.8)                               | (70.4, 80.0)                                  | (70.7, 80.2)                                | (73.6, 82.7)                                 | (67.4, 77.2)                                 | (68.3, 78.1)                                |
|                          |          |                                            |                                               |                                             |                                              |                                              |                                             |
| Any Unsolicited AE       | n (%), E | 117 (35.6%), 217                           | 133 (40.3%), 285                              | 125 (38.0%), 266                            | 132 (40.1%), 255                             | 130 (39.3%), 237                             | 124 (37.5%), 274                            |
|                          | 95% CI   | (30.4, 41.0)                               | (35.0, 45.8)                                  | (32.7, 43.5)                                | (34.8, 45.6)                                 | (34.0, 44.8)                                 | (32.2, 42.9)                                |

n (%): No. of participants (percentage), E: number of events

Supplementary table 5 Severity of solicited and unsolicited adverse events within seven days post vaccination (all three doses combined) by vaccine arms

|                        | Single rotavirus vaccine regimen                                                          |                                                                                              | Mixed rotavirus vaccine regimen                                                            |                                                                                             |                                                                                             |                                                                                            |
|------------------------|-------------------------------------------------------------------------------------------|----------------------------------------------------------------------------------------------|--------------------------------------------------------------------------------------------|---------------------------------------------------------------------------------------------|---------------------------------------------------------------------------------------------|--------------------------------------------------------------------------------------------|
| Severity               | Arm 1:<br>Rotavac -<br>Rotavac –<br>Rotavac<br>(No. of adverse<br>events = 1851)<br>n (%) | Arm 2:<br>Rotasiil -<br>Rotasiil –<br>Rotasiil<br>(No. of adverse<br>events = 1943)<br>n (%) | Arm 3:<br>Rotavac -<br>Rotasiil –<br>Rotavac<br>(No. of adverse<br>events = 1968)<br>n (%) | Arm 4:<br>Rotasiil -<br>Rotavac -<br>Rotasiil<br>(No. of adverse<br>events = 2004)<br>n (%) | Arm 5:<br>Rotavac -<br>Rotasiil –<br>Rotasiil<br>(No. of adverse<br>events = 1879)<br>n (%) | Arm 6:<br>Rotasiil -<br>Rotavac –<br>Rotavac<br>(No. of adverse<br>events = 1899)<br>n (%) |
| Mild n (%)             | 1595 (86.2)                                                                               | 1673 (86.1)                                                                                  | 1689 (85.8)                                                                                | 1743 (87.0)                                                                                 | 1634 (87.0)                                                                                 | 1600 (84.3)                                                                                |
| Moderate n (%)         | 252 (13.6)                                                                                | 265 (13.6)                                                                                   | 273 (13.9)                                                                                 | 256 (12.8)                                                                                  | 237 (12.6)                                                                                  | 295 (15.5)                                                                                 |
| Severe n (%)           | 3 (0.2)                                                                                   | 5 (0.3)                                                                                      | 6 (0.3)                                                                                    | 5 (0.2)                                                                                     | 8 (0.4)                                                                                     | 4 (0.2)                                                                                    |
| Life threatening n (%) | 1 (0.1)                                                                                   | 0 (0.0)                                                                                      | 0 (0.0)                                                                                    | 0 (0.0)                                                                                     | 0 (0.0)                                                                                     | 0 0.0 ()                                                                                   |

Supplementary table 6 Serious adverse events (SAE) among study participants by vaccine arms

| SAE Details                                         |          | Single rotavirus vaccine regimen                    |                                                        | Mixed rotavirus vaccine regimen                     |                                                      |                                                      |                                                      |
|-----------------------------------------------------|----------|-----------------------------------------------------|--------------------------------------------------------|-----------------------------------------------------|------------------------------------------------------|------------------------------------------------------|------------------------------------------------------|
|                                                     |          | Arm 1: Rotavac<br>- Rotavac -<br>Rotavac<br>(n=329) | Arm 2: Rotasiil<br>- Rotasiil -<br>Rotasiil<br>(n=330) | Arm 3: Rotavac<br>-Rotasiil -<br>Rotavac<br>(n=329) | Arm 4: Rotasiil<br>-Rotavac -<br>Rotasiil<br>(n=329) | Arm 5: Rotavac<br>-Rotasiil -<br>Rotasiil<br>(n=331) | Arm 6: Rotasiil<br>- Rotavac -<br>Rotavac<br>(n=331) |
| At least one SAE                                    | n (%), E | 9 (2.7%), 9                                         | 5 (1.5%), 5                                            | 5 (1.5%), 5                                         | 3 (0.9%), 3                                          | 5 (1.5%), 5                                          | 8 (2.4%), 8                                          |
|                                                     | 95% CI   | (1.3, 5.1)                                          | (0.5, 3.5)                                             | (0.5, 3.5)                                          | (0.2, 2.6)                                           | (0.5, 3.5)                                           | (1.0, 4.7)                                           |
| Any Severity                                        | n (%), E | 9 (2.7%), 9                                         | 5 (1.5%), 5                                            | 5 (1.5%), 5                                         | 3 (0.9%), 3                                          | 5 (1.5%), 5                                          | 8 (2.4%), 8                                          |
|                                                     | 95% CI   | (1.3, 5.1)                                          | (0.5, 3.5)                                             | (0.5, 3.5)                                          | (0.2, 2.6)                                           | (0.5, 3.5)                                           | (1.0, 4.7)                                           |
| Life-Threatening                                    | n (%), E | 1 (0.3%), 1                                         | 0 (0.0%), 0                                            | 0 (0.0%), 0                                         | 0 (0.0%), 0                                          | 0 (0.0%), 0                                          | 0 (0.0%), 0                                          |
|                                                     | 95% CI   | (0.0, 1.7)                                          | (0.0, 0.9)                                             | (0.0, 0.9)                                          | (0.0, 0.9)                                           | (0.0, 0.9)                                           | (0.0, 0.9)                                           |
| Severe                                              | n (%), E | 7 (2.1%), 7                                         | 5 (1.5%), 5                                            | 5 (1.5%), 5                                         | 3 (0.9%), 3                                          | 5 (1.5%), 5                                          | 7 (2.1%), 7                                          |
|                                                     | 95% CI   | (0.9, 4.3)                                          | (0.5, 3.5)                                             | (0.5, 3.5)                                          | (0.2, 2.6)                                           | (0.5, 3.5)                                           | (0.9, 4.3)                                           |
| Moderate                                            | n (%), E | 1 (0.3%), 1                                         | 0 (0.0%), 0                                            | 0 (0.0%), 0                                         | 0 (0.0%), 0                                          | 0 (0.0%), 0                                          | 1 (0.3%), 1                                          |
|                                                     | 95% CI   | (0.0, 1.7)                                          | (0.0, 0.9)                                             | (0.0, 0.9)                                          | (0.0, 0.9)                                           | (0.0, 0.9)                                           | (0.0, 1.7)                                           |
| Mild                                                | n (%), E | 0 (0.0%), 0                                         | 0 (0.0%), 0                                            | 0 (0.0%), 0                                         | 0 (0.0%), 0                                          | 0 (0.0%), 0                                          | 0 (0.0%), 0                                          |
|                                                     | 95% CI   | (0.0, 0.9)                                          | (0.0, 0.9)                                             | (0.0, 0.9)                                          | (0.0, 0.9)                                           | (0.0, 0.9)                                           | (0.0, 0.9)                                           |
| At least one related SAE                            | n (%), E | 1 (0.3%), 1                                         | 0 (0.0%), 0                                            | 0 (0.0%), 0                                         | 0 (0.0%), 0                                          | 0 (0.0%), 0                                          | 0 (0.0%), 0                                          |
|                                                     | 95% CI   | (0.0, 1.7)                                          | (0.0, 0.9)                                             | (0.0, 0.9)                                          | (0.0, 0.9)                                           | (0.0, 0.9)                                           | (0.0, 0.9)                                           |
| At least one SAE resulting in death                 | n (%)    | 1 (0.3%)                                            | 0 (0.0%)                                               | 0 (0.0%)                                            | 0 (0.0%)                                             | 0 (0.0%)                                             | 0 (0.0%)                                             |
|                                                     | 95% CI   | (0.0, 1.7)                                          | (0.0, 0.9)                                             | (0.0, 0.9)                                          | (0.0, 0.9)                                           | (0.0, 0.9)                                           | (0.0, 0.9)                                           |
| At least one SAE resulting in hospitalization       | n (%), E | 8 (2.4%), 8                                         | 5 (1.5%), 5                                            | 5 (1.5%), 5                                         | 3 (0.9%), 3                                          | 5 (1.5%), 5                                          | 8 (2.4%), 8                                          |
|                                                     | 95% CI   | (1.1, 4.7)                                          | (0.5, 3.5)                                             | (0.5, 3.5)                                          | (0.2, 2.6)                                           | (0.5, 3.5)                                           | (1.1, 4.7)                                           |
| At Least one SAE leading to Subject Discontinuation | n (%), E | 0 (0.0%), 0                                         | 0 (0.0%), 0                                            | 0 (0.0%), 0                                         | 0 (0.0%), 0                                          | 0 (0.0%), 0                                          | 0 (0.0%), 0                                          |
|                                                     | 95% CI   | (0.0, 0.9)                                          | (0.0, 0.9)                                             | (0.0, 0.9)                                          | (0.0, 0.9)                                           | (0.0, 0.9)                                           | (0.0, 0.9)                                           |

n (%), E: No. of participants (percentage), No. of events

Supplementary Table 7. Causes of early termination

| Reasons                                                    | Frequency (%) |
|------------------------------------------------------------|---------------|
| Migrated away from the study area                          | 40 (31.5%)    |
| Parent withdrew consent                                    | 35 (27.6%)    |
| Child presented after window period allowed by protocol    | 25 (19.7%)    |
| Child received rotavirus vaccine from a different facility | 10 (7.9%)     |
| Investigator discretion                                    | 5 (3.9%)      |
| Death or illness in family                                 | 4 (3.1%)      |
| Lost to follow-up                                          | 4 (3.1%)      |
| Illness of child                                           | 3 (2.4%)      |
| Death                                                      | 1 (0.8%)      |
| Total                                                      | 127           |



Supplementary Table 8. National Immunization Schedule of India (for infants). Rotavirus was included in the schedule while the trial was ongoing.

| Vaccine                                     | When to give                                                                          | Dose                                | Route         | Site                                  |
|---------------------------------------------|---------------------------------------------------------------------------------------|-------------------------------------|---------------|---------------------------------------|
| BCG                                         | At birth or as early as possible till one year of age                                 | 0.1ml (0.05ml until 1 month of age) | Intra-dermal  | Left Upper Arm                        |
| Hepatitis B Birth dose                      | At birth or as early as possible within 24 hours                                      | 0.5 ml                              | Intramuscular | Anterolateral side of mid thigh-LEFT  |
| OPV Birth dose                              | At birth or as early as possible within the first 15 days                             | 2 drops                             | Oral          | -                                     |
| OPV 1, 2 & 3                                | At 6 weeks, 10 weeks & 14 weeks                                                       | 2 drops                             | Oral          | -                                     |
| IPV (inactivated Polio Vaccine)             | 14 weeks                                                                              | 0.5 ml                              | Intramuscular | Anterolateral side of mid thigh-RIGHT |
| Pentavalent vaccine (DPT, HBV, HiB) 1,2 & 3 | At 6 weeks, 10 weeks & 14 weeks                                                       | 0.5 ml                              | Intramuscular | Anterolateral side of mid thigh-LEFT  |
| Rota Virus Vaccine                          | At 6 weeks, 10 weeks & 14 weeks                                                       | 5 drops                             | Oral          | -                                     |
| Measles 1 <sup>st</sup> Dose                | 9 completed months-12 months. (give up to 5 years if not received at 9-12 months age) | 0.5 ml                              | Subcutaneous  | Right Upper Arm                       |
| Vitamin A, 1 <sup>st</sup> Dose             | At 9 months with measles                                                              | 1 ml (100,000 IU)                   | Oral          | -                                     |
